# Supplementary material for: Unique selectivity trends of highly permeable PAP[5] water channel membranes
Source: Royal Society of Chemistry journal article supplement (doi:10.1039/c8fd00043c), 2018-01-01
Supplement: c8fd00043c1.pdf [file c8fd00043c1.pdf]

## Supporting Information

### Unique selectivity trends of highly permeable PAP[5] water channel membranes

Woochul Song<sup>1</sup>, Yue-xiao Shen<sup>2</sup>, Chao Lang<sup>1</sup>, Prantik Saha<sup>3</sup>, Iryna V. Zenyuk<sup>4</sup>, Robert J. Hickey<sup>5</sup>  
and Manish Kumar<sup>\*1,6,7</sup>

<sup>1</sup> Department of Chemical Engineering, <sup>5</sup> Department of Materials Science and Engineering, <sup>6</sup> Department of Biomedical Engineering, <sup>7</sup> Department of Civil and Environmental Engineering, The Pennsylvania State University, University Park, PA, 16802 USA

<sup>2</sup> Department of Chemistry, University of California, Berkeley, CA, 94720 USA

<sup>3</sup> Department of Physics and Astronomy, <sup>4</sup> Department of Mechanical Engineering, Tufts University, Medford, MA, 02155 USA

\*To whom correspondence should be addressed. Tel.: (814)-865-7519; Email:

[manish.kumar@psu.edu](mailto:manish.kumar@psu.edu)

### Debye length ( $\lambda_D$ ) calculation

The Debye length ( $\lambda_D$ , nm) of various ionic solutions is calculated by the equation,

$$\lambda_D = \sqrt{\frac{\varepsilon_0 \varepsilon_r k_B T}{2 N_A e^2 I}} \quad (1)$$

where  $\varepsilon_0$  and  $\varepsilon_r$  are vacuum and relative permittivity,  $k_B$  is the Boltzmann constant, T is the absolute temperature (K),  $N_A$  is the Avogadro's number,  $e$  is the elementary charge and  $I$  is the ionic strength ( $\text{mol} \cdot \text{L}^{-1}$ ) of the solution.<sup>1</sup> The ionic strength of the solution is defined as

$$I = \frac{1}{2} \sum c_i z_i^2 \quad (2)$$

where  $c_i$  and  $z_i$  are molar concentration (M) and valence number of charged ions, respectively.<sup>2</sup> For the methyl blue dye rejection test, the ionic strength of the solutions was adjusted using NaCl.

### Donnan rejection calculation

Theoretical Donnan rejections for various ionic solutes in **Figure 3A** were calculated by following equation.<sup>3</sup>

$$R = 1 - \left( \frac{|z_i| c_i}{|z_i| c_i^m + c_x^m} \right)^{|z_i/z_j|} \quad (3)$$

where  $c_i$  and  $c_i^m$  are co-ion (same charge ions with membrane) concentrations of feed solution and membrane,  $c_x^m$  is the charge concentration of the membrane,  $i$  and  $j$  represents the opposite charge signs, and  $z$  is the ionic valence number.  $c_i^m$  is generally adapted as the co-ion concentration of the permeate solution.<sup>3</sup>  $c_x^m$  is obtained by fitting the experimental rejection value of  $\text{Ru}(\text{bipy})_3\text{Cl}_2$  (91.56 %) into equation (3), as shown in following equation.

$$\begin{aligned} c_x^m &= \frac{|z_i| c_i}{(1-R)^{|z_j/z_i|}} - |z_i| c_i^m = \frac{|z_i| c_i}{(1-R)^{|z_j/z_i|}} - |z_i| (c_i \times (1-R)) \\ &= 3.5 \text{mM} \end{aligned}$$

### Critical flux ( $J_c$ ) calculation

The critical flux of the ML-PAP[5] membrane is calculated by the equation,<sup>4-6</sup>

$$J_c = \frac{\varepsilon k_B T}{\eta R_p^2} \quad (4)$$

where  $\varepsilon$  is the porosity of the ML-PAP[5] membrane,  $\eta$  is the viscosity of the solution and  $R_p$  is the pore radius of the membrane. For the ML-PAP[5] membrane, within a  $1 \mu m \times 1 \mu m$  unit area, the actual channel number is  $\sim 4.2 \times 10^5$  and the pore radius was adapted from the radius of confined pillar[5]arene of the PAP[5] channels (0.25 nm).<sup>7</sup> Therefore, the  $\varepsilon$  is calculated as

$$\varepsilon = \frac{4.2 \times 10^5 \times \pi r^2}{1 \mu m \times 1 \mu m} = 0.0824$$

and the  $J_c$  is calculated as

$$J_c = \frac{0.0824 \times 1.38 \times 10^{-23} m^2 kgs^{-2} K^{-1} \times 293K}{(0.25 \times 10^{-9} nm)^2 \times 0.001 kg m^{-1} s^{-1}} \times \frac{mol H_2O}{0.000018 m^3} = 296,000 mol / m^2 s$$

## References

1. F. Fornasiero, H. G. Park, J. K. Holt, M. Stadermann, C. P. Grigoropoulos, A. Noy and O. Bakajin, *Proceedings of the National Academy of Sciences*, 2008, **105**, 17250-17255.
2. T. Solomon, *Journal of Chemical Education*, 2001, **78**, 1691.
3. J. Schaep, B. Van der Bruggen, C. Vandecasteele and D. Wilms, *Separation and Purification Technology*, 1998, **14**, 155-162.
4. D. R. Latulippe and A. L. Zydney, *Journal of Membrane Science*, 2009, **329**, 201-208.
5. D. R. Latulippe, K. Ager and A. L. Zydney, *Journal of Membrane Science*, 2007, **294**, 169-177.
6. S. Daoudi and F. Brochard, *Macromolecules*, 1978, **11**, 751-758.
7. Y. X. Shen, W. Si, M. Erbakan, K. Decker, R. De Zorzi, P. O. Saboe, Y. J. Kang, S. Majd, P. J. Butler, T. Walz, A. Aksimentiev, J. L. Hou and M. Kumar, *Proc Natl Acad Sci U S A*, 2015, **112**, 9810-9815.
